# Supplementary material for: Management of Adverse Events Associated with Cabozantinib Treatment in Patients with Advanced Hepatocellular Carcinoma
Source: PubMed Central journal article supplement — Target Oncol. 2020 Aug 8;15(4):549–65. doi: 10.1007/s11523-020-00736-8 (PMC7434721; doi:10.1007/s11523-020-00736-8), 2020-08-08
Supplement: 11523_2020_736_MOESM1_ESM.pdf [file 11523_2020_736_MOESM1_ESM.pdf]

## **Management of Adverse Events Associated with Cabozantinib Treatment in Patients with Advanced Hepatocellular Carcinoma**

Gabriel Schwartz,<sup>1</sup> Julianne O. Darling,<sup>2</sup> Malori Mindo,<sup>3</sup> Lucia Damicis<sup>4</sup>

<sup>1</sup>Gastrointestinal Medical Oncology Clinic, University of California San Francisco, San Francisco, CA, USA

<sup>2</sup>Indiana University Health Simon Cancer Center, Indianapolis, IN, USA

<sup>3</sup>Department of Medicine, University of California San Francisco, San Francisco, CA, USA

<sup>4</sup>IRCCS Istituto Clinico Humanitas, Rozzano, Milan, Italy

### **Declarations:**

**Funding:** Medical writing assistance was provided by Karen O'Leary, PhD, and Michael Raffin (Fishawack Communications Inc., Conshohocken, PA, USA) and was funded by Exelixis, Inc.

**Conflicts of interest/Competing interests:** **GS** reports advisory board or speaker bureau fees from Exelixis, Eisai, and Amgen (all outside of the submitted work); **JOD** reports advisory board fees from Exelixis, Bayer, and Lilly (all outside of the submitted work); **MM** and **LD** have nothing to disclose.

**Supplementary Tables and Figures**

**Supplementary Table 1** Child-Pugh classification [125, 126]

| Assessment                              | Degree of abnormality | Score |
|-----------------------------------------|-----------------------|-------|
| Encephalopathy                          | None                  | 1     |
|                                         | Moderate              | 2     |
|                                         | Severe                | 3     |
| Ascites                                 | Absent                | 1     |
|                                         | Slight                | 2     |
|                                         | Moderate              | 3     |
| Bilirubin (mg/dL)                       | <2                    | 1     |
|                                         | 2.1–3                 | 2     |
|                                         | >3                    | 3     |
| Albumin (g/dL)                          | >3.5                  | 1     |
|                                         | 2.8–3.5               | 2     |
|                                         | <2.8                  | 3     |
| Prothrombin time<br>(seconds > control) | 0–3.9                 | 1     |
|                                         | 4–6                   | 2     |
|                                         | >6                    | 3     |

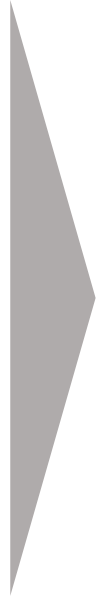

| Total score | Child-Pugh classification | Severity of impairment |
|-------------|---------------------------|------------------------|
| 5–6         | A                         | Mild                   |
| 7–9         | B                         | Moderate               |
| 10–15       | C                         | Severe                 |

**Supplementary Table 2** Examples of substrates, inhibitors, and inducers of cytochrome P450 3A4 [97, 101]

| Inhibitors                                                                                                                                                                                                                                                 | Inducers                                                                                                                                                                                                                                                                                                                                                                                                         |
|------------------------------------------------------------------------------------------------------------------------------------------------------------------------------------------------------------------------------------------------------------|------------------------------------------------------------------------------------------------------------------------------------------------------------------------------------------------------------------------------------------------------------------------------------------------------------------------------------------------------------------------------------------------------------------|
| <b>Strong<sup>a</sup></b>                                                                                                                                                                                                                                  | HIV antiviral:<br>efavirenz<br>nevirapine<br>Antiepileptic/antiseizure:<br>carbamazepine<br>oxcarbazepine<br>phenytoin<br>Antimycobacterials:<br>rifabutin<br>rifampin<br>rifapentin<br>Thiazolidinediones:<br>pioglitazone<br>troglitazone<br>Miscellaneous:<br>barbiturates (eg, phenobarbital)<br>glucocorticoids (eg, dexamethasone)<br>modafinil (diphenylmethane, promotes wakefulness)<br>St. John's wort |
| HIV antivirals:<br>indinavir<br>nelfinavir<br>ritonavir<br>saquinavir<br>Macrolide antibiotics:<br>clarithromycin<br>telithromycin<br>Antifungals:<br>itraconazole<br>ketoconazole<br>Miscellaneous:<br>nefazodone (antidepressant)                        |                                                                                                                                                                                                                                                                                                                                                                                                                  |
| <b>Moderate<sup>b</sup></b>                                                                                                                                                                                                                                |                                                                                                                                                                                                                                                                                                                                                                                                                  |
| Calcium channel blockers:<br>diltiazem<br>verapamil<br>NK-1 antagonists (antiemetic):<br>aprepitant<br>netupitant/palonosetron<br>Antifungals:<br>fluconazole<br>voriconazole<br>Miscellaneous:<br>erythromycin (macrolide antibiotic)<br>grapefruit juice |                                                                                                                                                                                                                                                                                                                                                                                                                  |
| <b>Weak<sup>c</sup></b>                                                                                                                                                                                                                                    |                                                                                                                                                                                                                                                                                                                                                                                                                  |
| Proton pump inhibitors:<br>esomeprazole<br>omeprazole<br>pantoprazole<br>Miscellaneous:<br>cimetidine (histamine H2 receptor antagonist)<br>lesinurad (urate transporter inhibitor)<br>atomoxetine (norepinephrine reuptake inhibitor)                     |                                                                                                                                                                                                                                                                                                                                                                                                                  |

This list is not exhaustive. Further information can be found in The Flockhart Table (available at <https://drug-interactions.medicine.iu.edu/MainTable.aspx>). Before prescribing medication to patients receiving cabozantinib, providers should consult the label to check for potential drug-drug interactions.

<sup>a</sup>Strong inhibitor: Causes >5-fold increase in the plasma AUC values or >80% decrease in clearance

<sup>b</sup>Moderate inhibitor: Causes >2-fold increase in the plasma AUC values or 50–80% decrease in clearance

<sup>c</sup>Weak inhibitor: >1.25-fold but <2-fold increase in the plasma AUC values or 20–50% decrease in clearance  
 AUC area under the curve, HIV human immunodeficiency virus, NK-1 neurokinin

**Supplementary Table 3** AE symptom grading derived from CTCAE 5.0. AEs are color coded by system: ■ gastrointestinal; ■ skin and subcutaneous tissue; ■ constitutional; ■ hepatic disorders; ■ cardiovascular/hematological disorders

| AE                        | Symptoms                                                                                           |                                                                                                                                    |                                                                                                                            |                                                                                 |
|---------------------------|----------------------------------------------------------------------------------------------------|------------------------------------------------------------------------------------------------------------------------------------|----------------------------------------------------------------------------------------------------------------------------|---------------------------------------------------------------------------------|
|                           | Grade 1                                                                                            | Grade 2                                                                                                                            | Grade 3                                                                                                                    | Grade 4                                                                         |
| <b>PPE</b>                | Minimal skin changes or dermatitis (eg, erythema, edema, or hyperkeratosis without pain)           | Skin changes (eg, peeling, blisters, bleeding, fissures, edema, hyperkeratosis with pain); limiting instrumental ADL               | Severe skin changes (eg, peeling, blisters, bleeding fissures, edema, or hyperkeratosis) with pain; limiting self-care ADL | –                                                                               |
| <b>Fatigue</b>            | Fatigue relieved by rest                                                                           | Fatigue not relieved by rest; limiting instrumental ADL                                                                            | Fatigue not relieved by rest; limiting self-care ADL                                                                       | –                                                                               |
| <b>Diarrhea</b>           | Increase of <4 stools per day over baseline; mild increase in ostomy output compared with baseline | Increase of 4–6 stools per day over baseline; moderate increase in ostomy output compared with baseline; limiting instrumental ADL | Increase of ≥7 stools per day over baseline; hospitalization indicated; severe                                             | Life-threatening consequences; urgent intervention indicated                    |
| <b>Decreased Appetite</b> | Loss of appetite without alteration of eating habits                                               | Oral intake altered without significant weight loss or malnutrition; oral nutritional supplements indicated                        | Associated with significant weight loss or malnutrition; tube feeding or TPN indicated                                     | Life-threatening consequences; urgent intervention indicated                    |
| <b>Nausea</b>             | Loss of appetite without change in eating habits                                                   | Oral intake decreased without significant weight loss, dehydration, or malnutrition                                                | Inadequate oral caloric or fluid intake; tube feeding, TPN, or hospitalization indicated                                   | –                                                                               |
| <b>Vomiting</b>           | Intervention not indicated                                                                         | Outpatient IV hydration; medical intervention indicated                                                                            | Tube feeding, TPN, or hospitalization indicated                                                                            | Life-threatening consequences                                                   |
| <b>Oral mucositis</b>     | Asymptomatic or mild symptoms; intervention not indicated                                          | Moderate pain or ulcer that does not interfere with oral intake; modified diet indicated                                           | Severe pain; interfering with oral intake                                                                                  | Life-threatening consequences; urgent intervention indicated                    |
| <b>Hypertension</b>       | SBP 120–139 mmHg or DBP 80–89 mmHg                                                                 | SBP 140–159 mmHg or DBP 90–99 mmHg                                                                                                 | SBP ≥160 mmHg or DBP ≥100 mmHg                                                                                             | Life-threatening consequences (eg, malignant hypertension, hypertensive crisis) |
| <b>Increased AST</b>      | >ULN –3.0 x ULN if baseline was normal; 1.5–3.0 x baseline if baseline was abnormal                | >3.0–5.0 x ULN if baseline was normal; >3.0–5.0 x baseline if baseline was abnormal                                                | >5.0–20.0 x ULN if baseline was normal; >5.0–20.0 x baseline if baseline was abnormal                                      | >20.0 x ULN if baseline was normal; >20.0 x baseline if baseline was abnormal   |
| <b>Increased ALT</b>      | >ULN –3.0 x ULN if baseline was normal; 1.5–3.0 x baseline if baseline was abnormal                | >3.0–5.0 x ULN if baseline was normal; >3.0–5.0 x baseline if baseline was abnormal                                                | >5.0–20.0 x ULN if baseline was normal; >5.0–20.0 x baseline if baseline was abnormal                                      | >20.0 x ULN if baseline was normal; >20.0 x baseline if baseline was abnormal   |

ADL activities of daily living, AE adverse event, ALT alanine aminotransferase, AST aspartate aminotransferase, CTCAE Common Terminology Criteria for Adverse Events, DBP diastolic blood pressure, IV intravenous, PPE palmar-plantar erythrodysesthesia, SBP systolic blood pressure, TPN total parenteral nutrition, ULN upper limits of normal, x times

**Supplementary Table 4** Resources for patients and caregivers

| Resources for Patients and Caregivers                                                                                                                                                                                                                                                                                                                                                                                                                                                                                                                                                                                                                                                                                                                                                                                                                                                                                                                                                                                                                                                                                                                                                                                                                                                                                                                                                                                                                                      |
|----------------------------------------------------------------------------------------------------------------------------------------------------------------------------------------------------------------------------------------------------------------------------------------------------------------------------------------------------------------------------------------------------------------------------------------------------------------------------------------------------------------------------------------------------------------------------------------------------------------------------------------------------------------------------------------------------------------------------------------------------------------------------------------------------------------------------------------------------------------------------------------------------------------------------------------------------------------------------------------------------------------------------------------------------------------------------------------------------------------------------------------------------------------------------------------------------------------------------------------------------------------------------------------------------------------------------------------------------------------------------------------------------------------------------------------------------------------------------|
| <b>AE Reporting and Management</b>                                                                                                                                                                                                                                                                                                                                                                                                                                                                                                                                                                                                                                                                                                                                                                                                                                                                                                                                                                                                                                                                                                                                                                                                                                                                                                                                                                                                                                         |
| <ul style="list-style-type: none"><li>■ Cabozantinib-specific advice on AEs, when to report AEs, and AE management tips<br/><a href="https://cabometryx.com/side-effects">https://cabometryx.com/side-effects</a><br/><a href="https://cabometryx.com/side-effect-management">https://cabometryx.com/side-effect-management</a><br/><a href="https://about-cancer.cancerresearchuk.org/about-cancer/cancer-in-general/treatment/cancer-drugs/drugs/cabozatinib">https://about-cancer.cancerresearchuk.org/about-cancer/cancer-in-general/treatment/cancer-drugs/drugs/cabozatinib</a><br/><a href="http://chemocare.com/chemotherapy/drug-info/cabozantinib.aspx">http://chemocare.com/chemotherapy/drug-info/cabozantinib.aspx</a></li><li>■ Patient education on cancer treatment–induced AEs and reporting<br/><a href="https://www.cancerresearchuk.org/about-cancer/cancer-in-general/treatment/cancer-drugs/side-effects/about">https://www.cancerresearchuk.org/about-cancer/cancer-in-general/treatment/cancer-drugs/side-effects/about</a> (UK)<br/><a href="https://www.cancer.gov/about-cancer/treatment/side-effects">https://www.cancer.gov/about-cancer/treatment/side-effects</a> (US)<br/><a href="https://www.cancerca.org/tagged/side_effects">https://www.cancerca.org/tagged/side_effects</a> (US)<br/><a href="http://chemocare.com/chemotherapy/side-effects/default.aspx">http://chemocare.com/chemotherapy/side-effects/default.aspx</a></li></ul> |
| <b>Mobile Apps</b>                                                                                                                                                                                                                                                                                                                                                                                                                                                                                                                                                                                                                                                                                                                                                                                                                                                                                                                                                                                                                                                                                                                                                                                                                                                                                                                                                                                                                                                         |
| <ul style="list-style-type: none"><li>■ Mobile app for patient education<br/><a href="https://www.cancer.net/navigating-cancer-care/managing-your-care/mobile-applications">https://www.cancer.net/navigating-cancer-care/managing-your-care/mobile-applications</a><br/>(Cancer.net App)</li></ul>                                                                                                                                                                                                                                                                                                                                                                                                                                                                                                                                                                                                                                                                                                                                                                                                                                                                                                                                                                                                                                                                                                                                                                        |
| <b>Social Media Resources: HCC</b>                                                                                                                                                                                                                                                                                                                                                                                                                                                                                                                                                                                                                                                                                                                                                                                                                                                                                                                                                                                                                                                                                                                                                                                                                                                                                                                                                                                                                                         |
| <ul style="list-style-type: none"><li>■ Patient-centered social media resources for patients with HCC and caregivers<br/><a href="https://www.patientslikeme.com/conditions/liver-ca">https://www.patientslikeme.com/conditions/liver-ca</a><br/><a href="https://survivorship.cancer.gov/">https://survivorship.cancer.gov/</a><br/><a href="https://rarediseases.org/rare-diseases/hepatocellular-carcinoma/">https://rarediseases.org/rare-diseases/hepatocellular-carcinoma/</a><br/><a href="https://www.cancer.org/cancer/liver-cancer.html">https://www.cancer.org/cancer/liver-cancer.html</a><br/><a href="https://liverfoundation.org/">https://liverfoundation.org/</a><br/><a href="https://www.britishlivertrust.org.uk/">https://www.britishlivertrust.org.uk/</a><br/><a href="https://www.liver.ca/">https://www.liver.ca/</a><br/><a href="https://www.ilca-online.org/patient-information/">https://www.ilca-online.org/patient-information/</a><br/><a href="https://www.mayoclinic.org/diseases-conditions/hepatocellular-carcinoma/cdc-20354552">https://www.mayoclinic.org/diseases-conditions/hepatocellular-carcinoma/cdc-20354552</a><br/><a href="https://www.esmo.org/content/download/6615/115103/file/EN-Liver-Cancer-Guide-for-Patients.pdf">https://www.esmo.org/content/download/6615/115103/file/EN-Liver-Cancer-Guide-for-Patients.pdf</a></li></ul>                                                                                     |

AE adverse event, HCC hepatocellular carcinoma, UK United Kingdom, US United States
